# Supplementary material
Source: PubMed Central journal article supplement (PMC3513530)

Supplemental Figure 1. Schematic representation of the study protocol.

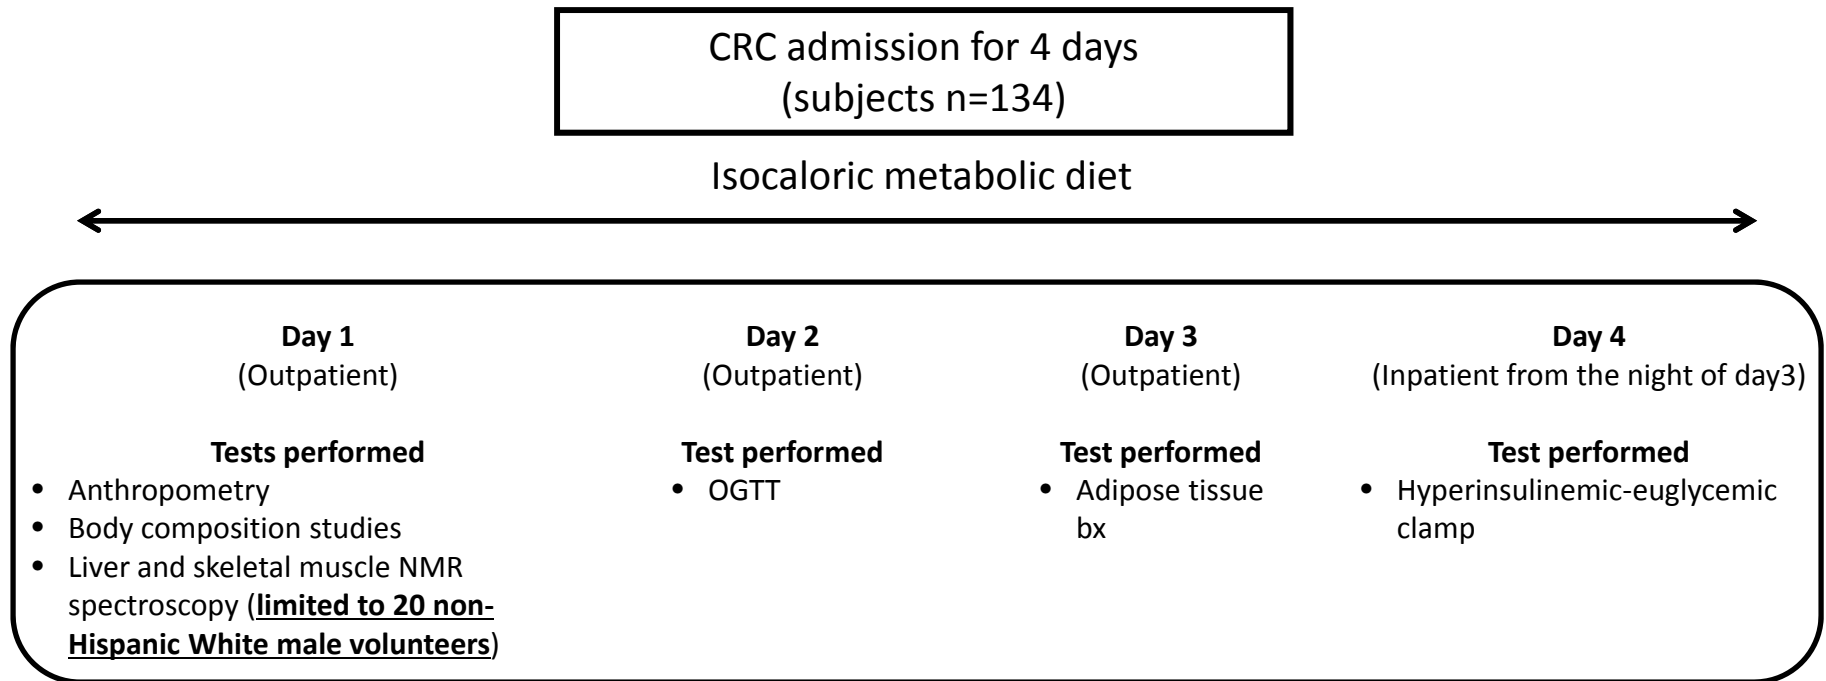

Supplement: supp_jc.2012-2018_12-2018_Supplemental_Figure.pdf [file supp_jc.2012-2018_12-2018_Supplemental_Figure.pdf]
